# Supplementary material for: Molecular assessment of apple varietal diversity in Uzbekistan for genetic resistance to major pathogens
Source: Research Square preprint supplement (doi:10.21203/rs.3.rs-8270299/v1), 2025-12-15
Supplement: Supplementary file 2 [file 3f55e2481db4362f3091beda.docx]

Table 3. Pairwise Nei’s genetic identity among apple cultivars from different geographic regions, based on loci associated with pathogen resistance.

|  | Surkhandaryo | | | Karakalpak | | |
| --- | --- | --- | --- | --- | --- | --- |
|  | Fire blight (*[E](https://en.wikipedia.org/wiki/Erwinia" \o "Erwinia).amylovora*) | Scab (*V.inaequalis*) | Powdery mildew (*P.leucotricha*) | Fire blight (*[E](https://en.wikipedia.org/wiki/Erwinia" \o "Erwinia).amylovora*) | Scab (*V.inaequalis*) | Powdery mildew (*P.leucotricha*) |
| Surkhandaryo | 1 | 1 | 1 | - | - | - |
| Karakalpak | 0.997 | 0.975 | 0.995 | 1 | 1 | 1 |
| Xorazm | 0.967 | 0.843 | 0.967 | 0.971 | 0.865 | 0.988 |
