# Supplementary material for: Molecular assessment of apple varietal diversity in Uzbekistan for genetic resistance to major pathogens
Source: Research Square preprint supplement (doi:10.21203/rs.3.rs-8270299/v1), 2025-12-15
Supplement: Supplementary file 3 [file 445fe8b24d09e267c7080c98.docx]

**Table 2.** Molecular marker genotypes of 109 local apple varieties showing presence (+) or absence (–) of resistance-associated alleles for *E. amylovora*, *P. leucotricha*, and *V. inaequalis*. Columns indicate each marker locus used in the study (AE10-375, GE-8019, CH-F7-Fb1 for fire blight; AT20-450, Pm739 for powdery mildew; and VfC, AM19, AL07 for apple scab), while the final column shows the **Resistance Index (RI)** calculated based on marker combinations. The letters in the accession number were assigned depending on its location in the geographical region of Uzbekistan. S -Surkhandarya, K- Karakalpakstan, X – Khorezm. The resistance index was assigned depending on the degree of pathogen infestation; Disease resistance index: 1-susceptible, 2-low resistance, 3-moderate resistance, 4- high resistance

|  |  | **Marker genotypes for resistance to fire blight (*[E](https://en.wikipedia.org/wiki/Erwinia" \o "Erwinia).amylovora*)** | | |  | **Marker genotypes for resistance to powdery mildew (*P.leucotricha*)** | | | | | **Marker genotypes for resistance to scab (*****V.inaequalis*)** | | | | | | |
| --- | --- | --- | --- | --- | --- | --- | --- | --- | --- | --- | --- | --- | --- | --- | --- | --- | --- |
|  |  | **GE-8019** | **AE10-375** | **CH-F7Fb1**  **(210bp)** |  | **AT20-450** | **Pm739** | | |  | **VfC** | | | **AM19** | **AL07** | |  |
| № | **Variety** |  | | | **Resistance Index** | **Pl1** | | **Pl2** | **Resitance Index** | | ***Vfa1***  **(646 bp)** | ***Vfa2***  **(484 bp)** | ***Vfa4***  **(286 bp)** | ***Vf***  **(526 bp)** | ***Vf***  **(466 bp)** | ***Vf***  **(724 bp)** | **Resistance Index** |
| SS01 | Qirmizak | - | + | - | 2 | + | | + | 3 | | - | + | - | - | - | + | 3 |
| SS02 | Renet Semerenko | - | + | - | 2 | + | | + | 4 | | - | + | - | - | - | + | 3 |
| SS03 | Atlas olma | - | + | + | 4 | + | | + | 4 | | - | + | - | + | - | + | 4 |
| SS04 | Turkish | - | + | + | 4 | + | | + | 4 | | - | + | - | + | - | + | 4 |
| SS05 | Atlas kechki | + | + | - | 4 | - | | + | 3 | | - | + | - | - | - | + | 3 |
| SS06 | Renet Simarenko | - | + | + | 3 | - | | + | 3 | | - | + | - | - | - | + | 3 |
| SS07 | Qirmizak | - | + | + | 4 | + | | + | 4 | | - | + | - | - | - | + | 3 |
| SS08 | Starkrimson | - | + | + | 4 | + | | + | 4 | | - | + | - | - | - | + | 3 |
| SS09 | Malus niedzwetzkyana | - | + | + | 4 | - | | - | 2 | | - | + | - | - | - | + | 3 |
| SS10 | Xuboni | - | + | + | 4 | + | | + | 4 | | - | + | - | + | - | + | 4 |
| SS11 | Sariq olma | + | + | + | 4 | + | | - | 3 | | - | + | - | - | - | + | 3 |
| SD01 | Mayskiy | - | - | - | 1 | - | | - | 1 | | + | + | - | - | - | + | 2 |
| SD02 | Xuboni | - | + | + | 4 | + | | - | 3 | | + | + | - | - | - | + | 2 |
| SD03 | Mayskiy | - | + | + | 4 | + | | - | 3 | | - | + | - | - | - | + | 3 |
| SD04 | Xuboni | - | + | - | 2 | + | | + | 4 | | - | + | - | - | - | + | 3 |
| SD05 | Atlas olma | - | + | - | 2 | + | | + | 4 | | - | + | - | - | - | + | 3 |
| SD06 | Mayskiy Qizil | - | + | - | 2 | + | | - | 3 | | + | + | - | - | - | + | 2 |
| SD07 | Eshak olma | - | - | - | 1 | - | | + | 3 | | + | + | - | - | - | + | 2 |
| SD08 | Qizil kechki olma | - | + | + | 4 | + | | - | 3 | | - | + | - | - | - | + | 3 |
| SD09 | Oq olma | - | - | - | 2 | - | | + | 3 | | - | + | - | - | - | + | 3 |
| KH01 | Besh barmoq | - | + | + | 3 | + | | + | 4 | | - | + | - | - | - | + | 3 |
| KH02 | Renet Semerenko | + | - | - | 2 | + | | + | 4 | | - | + | - | + | - | + | 4 |
| KH03 | Samarqandskiy ranniy | - | + | + | 3 | + | | + | 4 | | - | + | - | + | - | + | 4 |
| KH04 | Starkrimson | - | + | - | 2 | + | | + | 4 | | - | + | - | - | - | + | 3 |
| KH05 | Golden delicious | - | + | - | 2 | + | | + | 4 | | - | + | - | - | - | + | 3 |
| KH06 | Jonathan | - | + | + | 3 | - | | + | 3 | | - | + | - | - | - | + | 3 |
| KH07 | Pervenets Samarqanda | - | + | + | 3 | + | | + | 4 | | - | + | - | - | - | + | 3 |
| KH08 | Besh yulduz | - | + | + | 3 | - | | + | 3 | | - | + | - | - | - | + | 3 |
| KH09 | Besh barmoq | - | + | - | 2 | - | | + | 3 | | - | + | - | - | - | + | 3 |
| KH10 | Grimes Golden | + | + | - | 4 | - | | + | 3 | | - | + | - | + | - | + | 4 |
| KH11 | Qand olma kishgi | - | + | + | 3 | + | | + | 4 | | + | + | - | + | - | + | 3 |
| KH12 | Mayskiy | - | + | + | 3 | + | | + | 4 | | - | + | - | + | - | + | 4 |
| KH13 | Red delicious | - | + | + | 3 | + | | + | 4 | | - | + | - | + | - | + | 4 |
| KH14 | Qizil olma urtagi | - | + | - | 2 | + | | + | 4 | | - | + | - | - | - | + | 3 |
| KH15 | Qizil olma | - | + | + | 3 | - | | + | 3 | | - | + | - | - | - | + | 3 |
| KH16 | Shoyi olma | - | + | + | 3 | + | | + | 4 | | - | + | - | + | - | + | 4 |
| KH17 | Tosh olma | - | + | - | 2 | - | | + | 3 | | + | + | - | - | - | + | 2 |
| KH18 | Qand olma | - | + | + | 3 | - | | + | 3 | | + | + | - | - | - | + | 2 |
| KH19 | Krasniy jeleznyak | + | + | - | 4 | - | | + | 3 | | + | + | - | + | - | + | 3 |
| XS01 | Besh barmoq | - | + | - | 2 | + | | + | 4 | | - | + | - | + | - | + | 4 |
| XS02 | Grimes Golden | - | + | + | 2 | + | | - | 3 | | + | - | - | + | - | + | 2 |
| XS03 | So’x go’zali | - | + | + | 3 | + | | + | 4 | | - | + | - | - | - | + | 3 |
| XS04 | R.Semerenko | + | + | - | 4 | + | | + | 4 | | - | + | - | - | - | + | 3 |
| XS05 | Qizil sho’r olma | - | + | - | 2 | + | | + | 4 | | - | + | - | - | - | + | 3 |
| XS06 | Golden delicious | - | + | + | 3 | + | | + | 4 | | + | - | - | - | - | + | 2 |
| XS07 | Yozgi olma | - | + | + | 3 | - | | + | 3 | | - | + | - | - | - | + | 3 |
| XS08 | Krasniy jeleznyak | + | + | - | 4 | + | | + | 4 | | + | + | - | - | - | + | 2 |
| XS09 | Mayskiy | - | + | - | 2 | + | | + | 4 | | - | + | - | - | - | + | 3 |
| XS10 | Qizil olma | + | + | - | 4 | + | | + | 4 | | - | + | - | - | - | + | 3 |
| XS11 | Xazaraspskiy letniy | - | + | + | 4 | + | | + | 4 | | - | + | - | - | - | + | 3 |
| XS12 | Qand olma kishgi | - | + | - | 2 | + | | + | 4 | | - | + | - | - | - | + | 3 |
| XS13 | Qand olma | + | + | - | 4 | + | | + | 4 | | + | + | - | - | - | + | 2 |
| XS14 | Muz olma | - | + | - | 2 | + | | + | 4 | | + | - | - | - | - | + | 1 |
| XS15 | Xivinskiy beshbaroq | - | + | + | 4 | + | | + | 4 | | - | + | - | - | - | + | 3 |
| SSh01 | Renet Semerenko | - | - | + | 1 | + | | + | 4 | | - | + | - | - | - | + | 3 |
| SSh02 | Oq olma | - | - | - | 1 | + | | + | 4 | | + | + | - | + | - | + | 3 |
| SSh03 | Besh yulduz | - | - | - | 1 | - | | + | 3 | | + | + | - | + | - | + | 3 |
| SSh04 | Qizil olma | - | - | - | 1 | - | | + | 3 | | + | + | - | + | - | + | 3 |
| SSh05 | Besh yulduz | - | - | - | 1 | - | | + | 3 | | + | + | - | + | - | + | 3 |
| SSh06 | Renet Semerenko | - | - | - | 1 | - | | + | 3 | | + | + | - | + | - | + | 3 |
| SSh07 | Oq olma | - | - | - | 1 | + | | + | 4 | | + | + | - | + | - | + | 3 |
| SSh08 | Besh yulduz | - | + | + | 4 | + | | + | 4 | | + | + | - | - | - | + | 2 |
| KB01 | Krasniy jeleznyak | - | + | + | 4 | + | | + | 4 | | - | + | - | + | - | + | 4 |
| KB02 | Jonathan | - | + | + | 4 | + | | + | 4 | | - | + | - | - | - | + | 3 |
| KB03 | Yozgi olma | - | - | - | 1 | + | | + | 4 | | - | + | - | - | - | + | 3 |
| KB04 | Starkrimson | - | + | - | 2 | + | | + | 4 | | + | + | - | - | - | + | 2 |
| KB05 | Xazaraspskiy letniy | - | - | - | 1 | + | | + | 4 | | - | + | - | - | - | + | 3 |
| KB06 | Xazaraspskiy zimniy | - | - | - | 1 | + | | + | 4 | | + | + | - | - | - | + | 2 |
| KB07 | Shoyi olma | + | - | - | 2 | + | | + | 4 | | + | - | - | - | - | + | 1 |
| KB08 | Besh yulduz | - | + | - | 2 | + | | + | 4 | | + | - | - | - | - | + | 2 |
| KB09 | Golden delicious | - | + | - | 2 | + | | + | 4 | | + | + | - | - | - | + | 2 |
| KB10 | Malus niedzwetzkyana | - | + | + | 4 | + | | + | 4 | | + | + | - | - | - | + | 2 |
| KB11 | Rozemary white | - | + | + | 4 | + | | + | 4 | | - | + | - | - | - | + | 3 |
| KB12 | Besh barmoq | - | + | - | 2 | + | | + | 4 | | + | + | - | - | - | + | 2 |
| KB13 | Yanar | - | + | + | 4 | + | | + | 4 | | + | + | - | - | - | + | 2 |
| KB14 | Qizil olma (Red apple) | - | + | + | 4 | + | | + | 4 | | - | + | - | - | - | + | 3 |
| SKO01 | Qizil olma (Red apple) | - | + | - | 2 | + | | + | 4 | | + | + | - | - | - | + | 2 |
| SKO02 | Qizil olma (Red apple) | - | + | - | 2 | + | | + | 4 | | + | + | - | + | - | + | 3 |
| SKO03 | Qizil olma (Red apple) | - | + | - | 2 | + | | + | 4 | | - | + | - | + | - | + | 4 |
| SKO04 | Qizil olma (Red apple) | - | + | - | 2 | + | | + | 4 | | - | + | - | + | - | + | 4 |
| SKO05 | Renet Semerenko | - | + | - | 2 | + | | + | 4 | | + | + | - | + | - | + | 3 |
| SKO06 | Oq olma | - | + | - | 2 | + | | + | 4 | | + | + | - | - | - | + | 2 |
| SKO07 | Besh yulduz | - | + | - | 2 | + | | + | 4 | | + | + | - | + | - | + | 3 |
| SKO08 | Oq olma | - | + | - | 2 | + | | + | 4 | | - | + | - | + | - | + | 4 |
| SKO09 | Oq olma | - | - | - | 1 | + | | + | 4 | | - | + | - | + | - | + | 4 |
| SKO10 | Oq olma | - | + | - | 2 | + | | + | 4 | | - | + | - | + | - | + | 4 |
| SKO11 | Besh yulduz | - | + | - | 2 | + | | + | 4 | | + | + | - | + | - | + | 3 |
| SKO12 | Oq olma | - | + | - | 2 | + | | + | 4 | | + | + | - | + | - | + | 3 |
| SKb01 | Besh yulduz | - | + | + | 4 | + | | + | 4 | | + | + | - | + | - | + | 3 |
| Skb02 | Atlas | - | + | - | 2 | + | | + | 4 | | + | + | - | - | - | + | 2 |
| SKb03 | Qizil olma | - | - | + | 2 | + | | - | 3 | | - | + | - | - | - | + | 3 |
| SKb04 | Oq olma | - | + | - | 2 | + | | + | 4 | | - | + | - | - | - | + | 3 |
| SKb05 | Qizil olma | - | - | - | 1 | + | | + | 4 | | - | + | - | - | - | + | 3 |
| SKb06 | Qizil olma | - | + | - | 2 | + | | + | 4 | | - | + | - | - | - | + | 3 |
| SKb07 | Oq olma | - | + | - | 2 | + | | + | 4 | | - | + | - | - | - | + | 3 |
| SKb08 | Renet Semerenko | - | - | - | 1 | + | | + | 4 | | - | + | - | + | - | + | 4 |
| SKb09 | Qizil olma | - | - | - | 1 | + | | + | 4 | | - | + | - | + | - | + | 4 |
| SKb10 | Qizil olma | - | + | - | 1 | + | | + | 4 | | - | + | - | - | - | + | 3 |
| XK01 | Karvak qutir olma | - | + | - | 1 | + | | + | 4 | | - | + | - | - | - | + | 3 |
| XK02 | Avgustovskiy | - | - | - | 1 | - | | - | 1 | | - | + | - | - | - | + | 4 |
| XK03 | Ruxi janon | - | + | - | 1 | + | | + | 4 | | - | + | - | - | - | + | 4 |
| XK04 | Qand olma | - | + | - | 1 | + | | + | 4 | | - | + | - | - | - | + | 3 |
| XK05 | Karvak olma | + | + | - | 2 | + | | + | 4 | | - | + | - | - | - | + | 3 |
| XK06 | Qutir qand olma | - | + | + | 3 | + | | + | 4 | | - | + | - | - | - | + | 3 |
| XK07 | Jeleznyak | - | - | - | 1 | + | | + | 4 | | + | + | - | + | - | + | 3 |
| XK08 | Muz olma | - | + | - | 2 | + | | + | 4 | | - | + | - | + | - | + | 3 |
| XK09 | Renet Semerenko | - | + | + | 3 | + | | + | 4 | | + | + | - | - | - | + | 4 |
| XK10 | Besh barmoq | + | + | + | 4 | + | | + | 4 | | - | + | - | + | - | + | 2 |
| XK11 | Red delicious | - | + | - | 2 | + | | + | 4 | | + | + | - | + | - | + | 4 |
