# Supplementary material for: Molecular assessment of apple varietal diversity in Uzbekistan for genetic resistance to major pathogens
Source: Research Square preprint supplement (doi:10.21203/rs.3.rs-8270299/v1), 2025-12-15
Supplement: Supplementary file 4 [file 4fd88f97b5f08d51815d3be1.docx]

**Table 1.** List of the molecular markers for the apple scab, fire blight and powdery mildew resistance loci/genes along with their primer sequences, annealing temperature and amplicon sizes.

| **№** | **Marker name** | **Genes** | **Primer pairs** | **Та*** (℃) | **PCR band**** (b.p.) | **Reference** |
| --- | --- | --- | --- | --- | --- | --- |
| **Fire blight** | | | | | | |
| 1 | AE10-375 |  | F 5’-ctgaagcgcacgttctcc-3’  R 5’-ctgaagcgcatcatttctgatag-3’ | 60 | **375**/- | Khan et al., 2007 |
| 2 | CH-F7-Fb1 |  | F 5’-agccagatcacatgttttcatc-3’  F 5’-acaacggccaccagtttatc-3’ | 60 | **210**/174 |
| 3 | GE-8019 |  | F 5’-ttgagaccgattttcgtgtg-3’  R 5’-tctctcccagagcttcattg-3’ | 60 | **397**/- |
| **Powdery mildew** | | | | | | |
| 4 | AT20-450 | Pl-1 | F 5’-atcagccccacatgaatctcatacc-3’  R 5’-acatcagccctcaaagatgagaagt-3’ | 62 | **450**/500 | Markussen et al., 1995 |
| 5 | Pm739 | Pl-2 | F 5’-aacgaagatcaagaaacatgg-3’  R 5’-tgccgtcaatggaacacc-3’ | 53 | **269**/- | - |
| **Scab** | | | | | | |
| 6 | VfC | Vf1, Vf2, Vf4 | F 5’-ggtttccaaagtccaattcc-3’  R 5’-cgttagcattttgagttgac-3’ | 58 | **286/**484/646 | Afunian, 2004 |
| 7 | AM19 | Vf | F 5’-cgtagaacggaatttgacagtg-3’  R 5’-gacaaagggcttaagtgctcc-3’ | 60 | 526 | Tartarini, 1999 |
| 8 | AL07 | Vf | F-5’-tgg aag aga gat cca gaa agt g-3’  R-5’-cat ccc tcc aca aat gcc-3’ | 60 | **466/724** | Tartarini, 1999 |
